# Supplementary material
Source: bioRxiv or medRxiv preprint supplement (https://www.medrxiv.org/highwire/filestream/96902/field_highwire_adjunct_files/5/2020.09.14.20192609-6.pdf)

### Post-translational protein modification

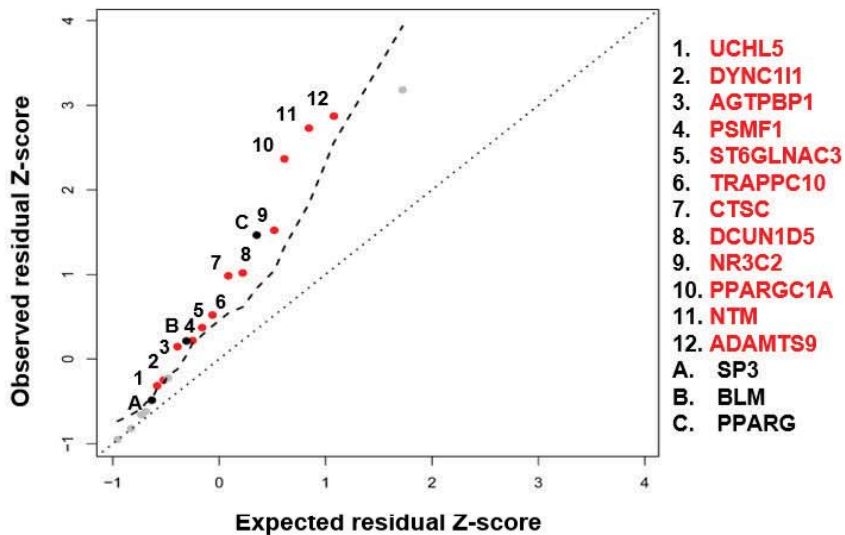

### Translocation of ZAP-70 to immunological synapse

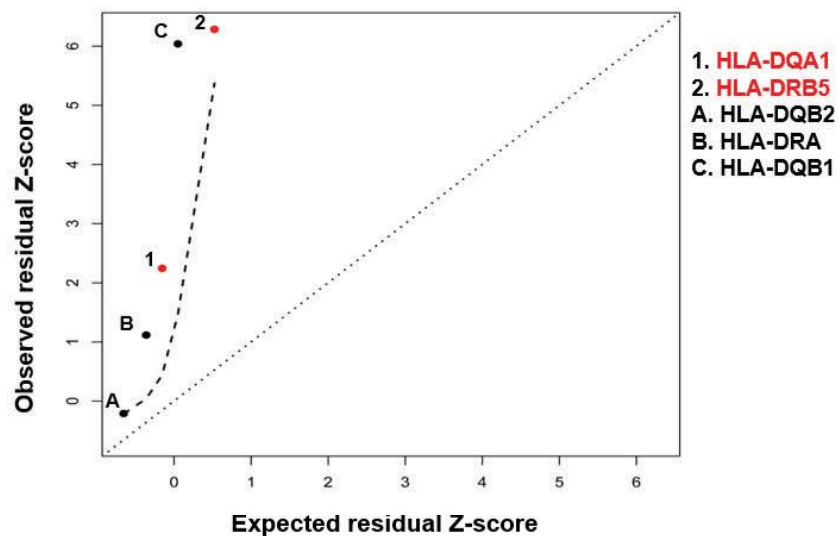

### Metabolism

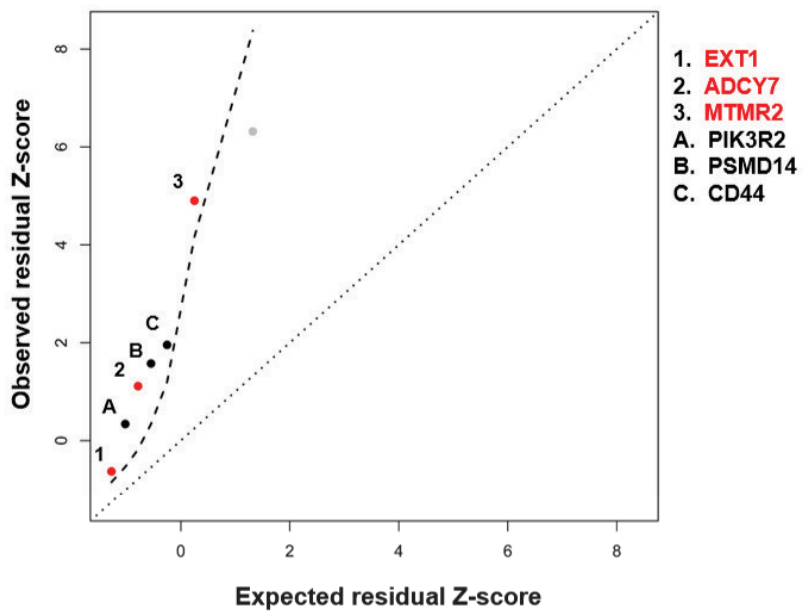

### Cell cycle

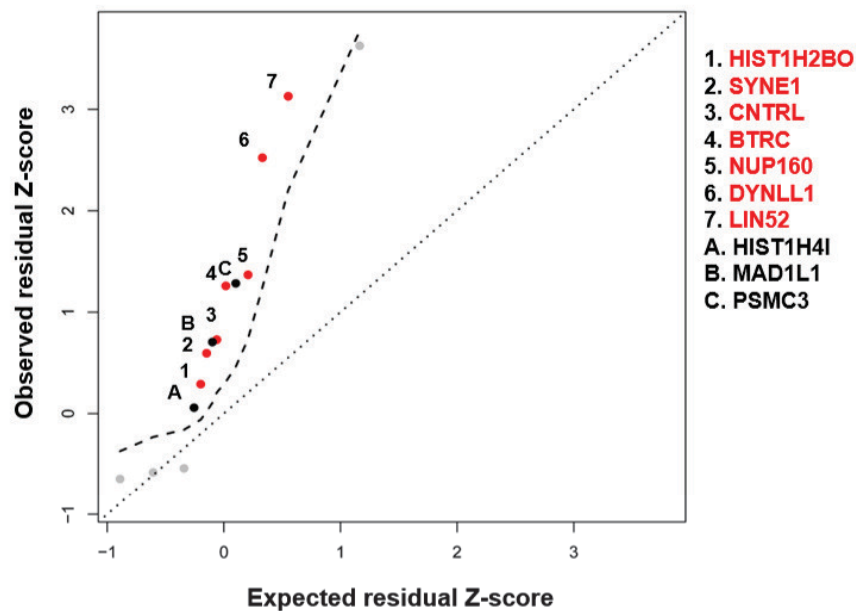

Supplement: Supplementary file [file 2020.09.14.20192609-6.pdf]
